# Supplementary material
Source: PubMed Central journal article supplement (PMC3884816)

Supporting information:

# Short Interfering RNA Guide Strand Modifiers from Computational Screening

Kazumitsu Onizuka, Jason G. Harrison, Alexi A. Ball-Jones, José M. Ibarra-Soza, Yuxuan Zheng, Diana Ly, Walter Lam, Stephanie Mac, Dean J. Tantillo\* and Peter A. Beal\*

Department of Chemistry, University of California, Davis, One Shields Ave, Davis, California (USA) 95616

## Contents of Supporting Information:

### Supplementary Figures

|                                     |        |
|-------------------------------------|--------|
| <b>Supplementary Figure 1</b> ..... | S2, S3 |
| <b>Supplementary Figure 2</b> ..... | S4     |
| <b>Supplementary Figure 3</b> ..... | S4     |
| <b>Supplementary Figure 4</b> ..... | S5     |

### Supplementary Method

|                             |    |
|-----------------------------|----|
| Serum stability assay ..... | S5 |
|-----------------------------|----|

### Supplementary Table

|                                    |    |
|------------------------------------|----|
| <b>Supplementary Table 1</b> ..... | S6 |
|------------------------------------|----|

### NMR data

|                                                 |     |
|-------------------------------------------------|-----|
| <sup>1</sup> H NMR for compound <b>2</b> .....  | S7  |
| <sup>13</sup> C NMR for compound <b>2</b> ..... | S8  |
| <sup>1</sup> H NMR for compound <b>3</b> .....  | S9  |
| <sup>13</sup> C NMR for compound <b>3</b> ..... | S10 |
| NOE data for compound <b>3</b> .....            | S11 |
| <sup>1</sup> H NMR for compound <b>4</b> .....  | S12 |
| <sup>13</sup> C NMR for compound <b>4</b> ..... | S13 |
| <sup>31</sup> P NMR for compound <b>5</b> ..... | S14 |

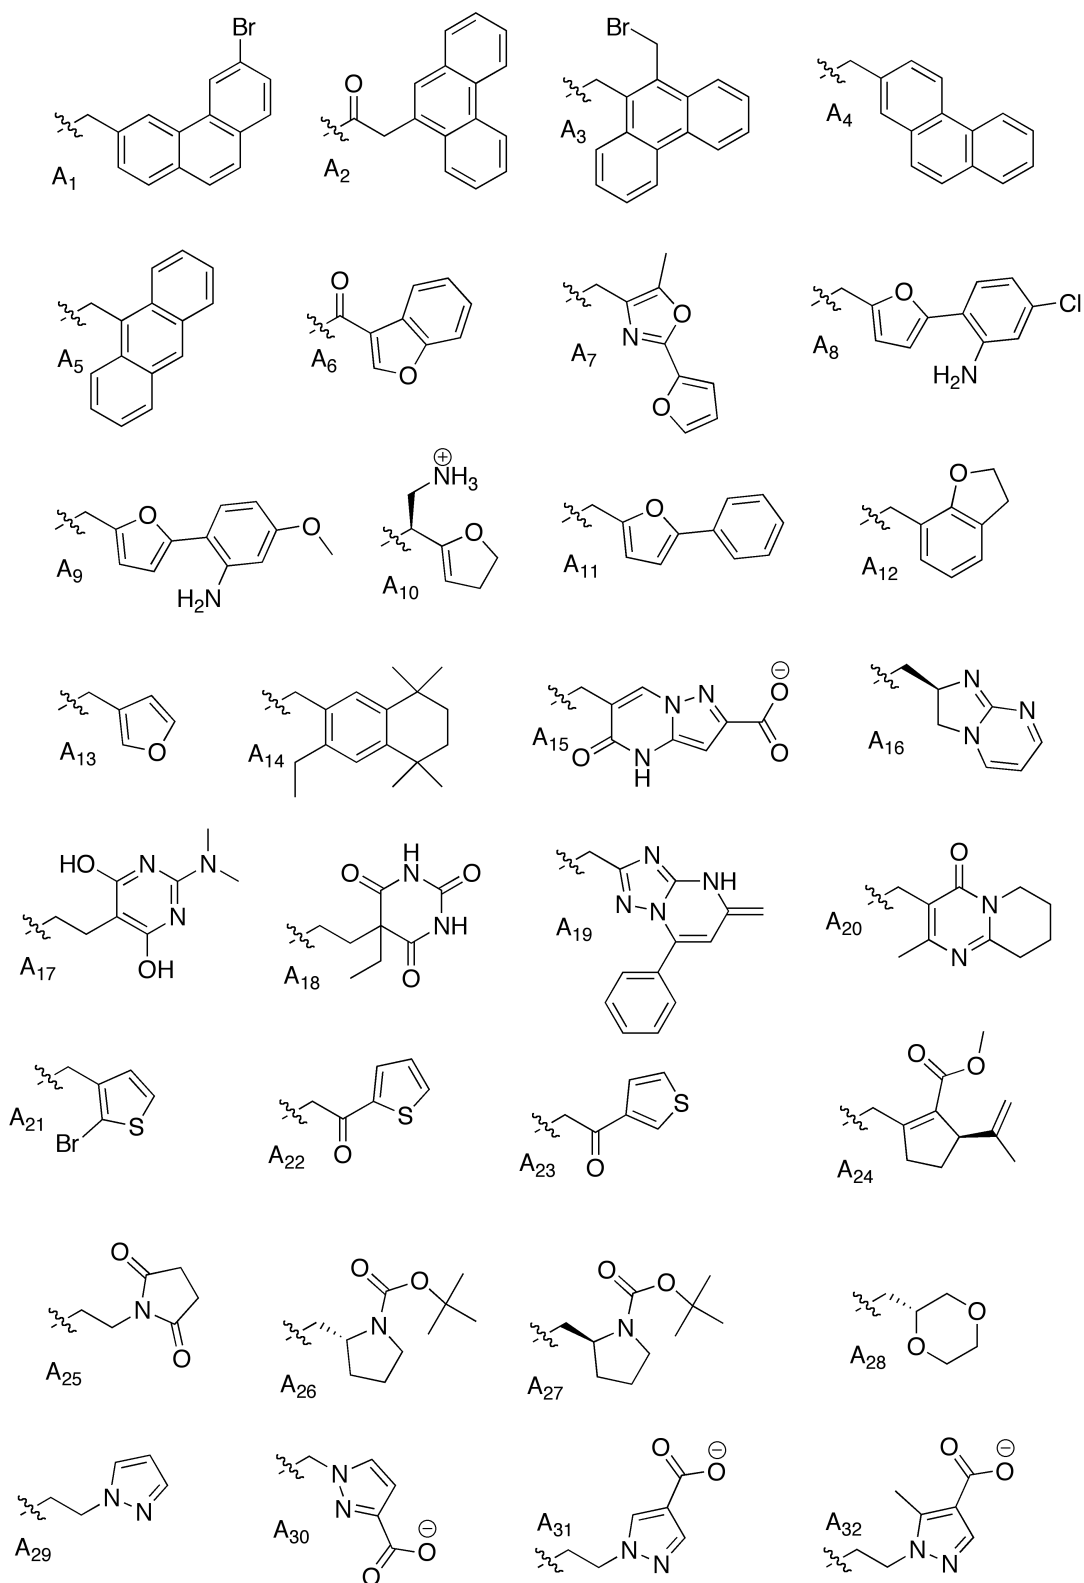

**Supplementary Figure 1.** Triazole substituents used in the computational screening in this study.

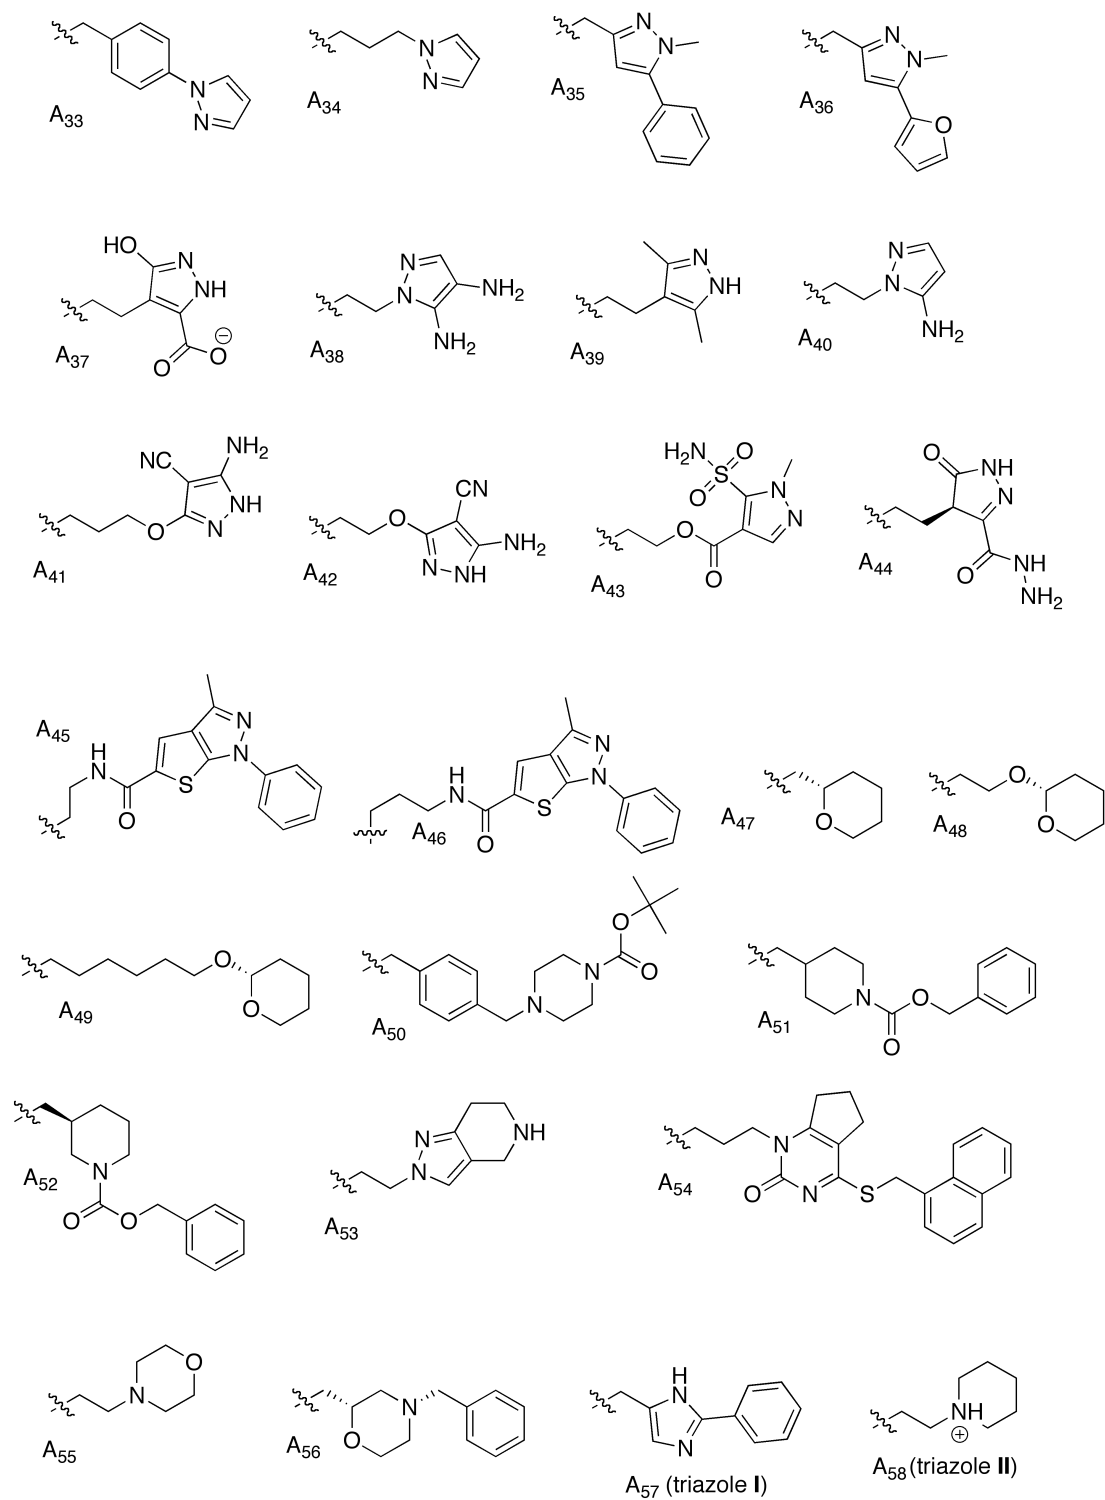

**Supplementary Figure 1 (continued).**

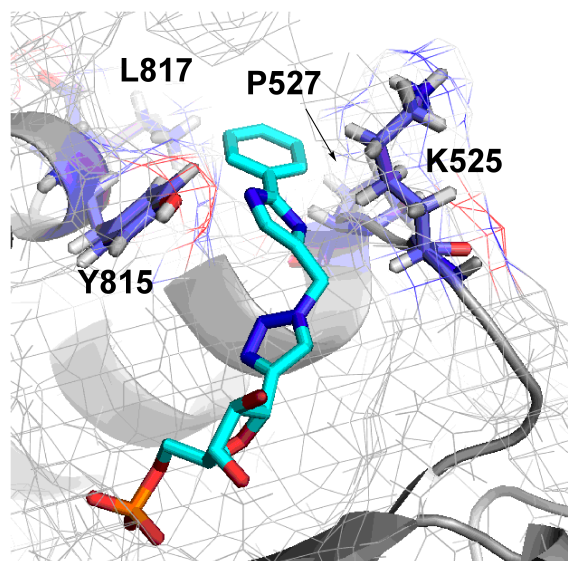

**Supplementary Figure 2.** Docking of 1-ER triazole **I** suggests binding in a cleft between the MID (K525, P527) and PIWI (Y815, L817) domains adjacent to the guide strand 5'-end binding site in hAgo2 (Schirle, N.T; MacRae, I.J *Science* **2012**, 336, 1037).

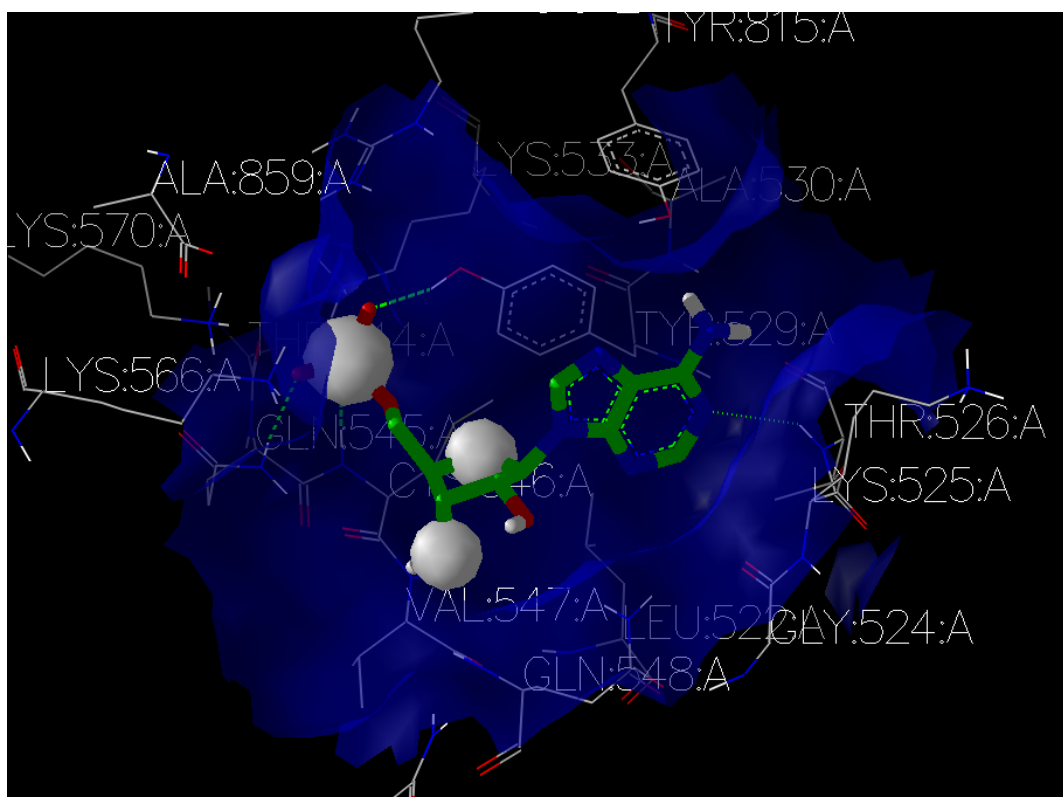

**Supplementary Figure 3.** Constraints imposed on docking experiment, at the phosphate, ribose 4' oxygen, and 2' oxygen linker (modeled as hydroxyl), shown on crystal structure with adenosine. Visualized with VIDA from OpenEye Suite of programs (OEChem, version 1.7.4, OpenEye Scientific Software, Inc., Santa Fe, NM, USA, [www.eyesopen.com](http://www.eyesopen.com), 2010).

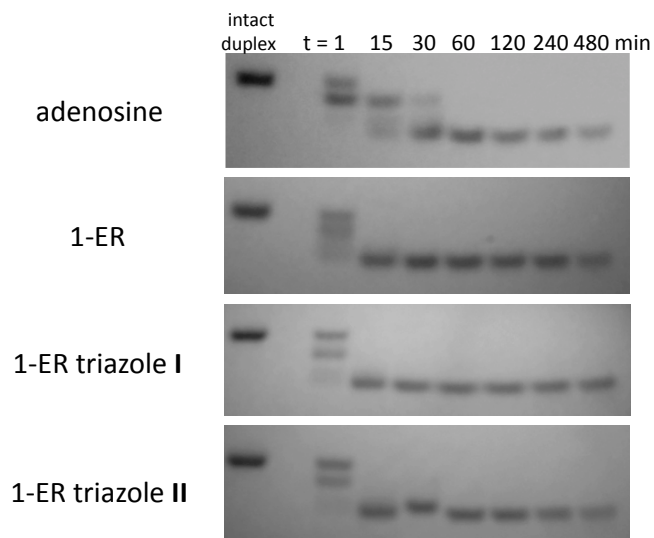

**Supplementary Figure 4.** Serum stability assay data for PIK3CB siRNAs with various guide strand 5' end modifications showing major degradation products formed at the time points specified above. Images above are of 18% native polyacrylamide gels imaged by UV shadow with a F254 TLC plate as a backing and depicted in grayscale for clarity.

*Serum stability assay.* siRNA duplexes were hybridized in 1x PBS without calcium and magnesium to afford a final reaction concentration of 40  $\mu$ M siRNA in 1x PBS with 10% human serum (Sigma Aldrich). Reaction was incubated at 37  $^{\circ}$ C with 5  $\mu$ L aliquots removed at desired time lengths (1, 15, 30, 60, 120, 240, and 480 min) and quenched with 5  $\mu$ L of quenching solution (10% glycerol in 1x TBE buffer) then immediately stored at -70  $^{\circ}$ C. Reactions were analyzed as previously described<sup>1</sup> and imaged by UV shadow as described for oligonucleotide purifications. Gel images are shown in grayscale for clarity.

1) Hernández, A. R.; Peterson, L. W.; Kool, E. T. *ACS Chem. Biol.* **2012**, 7 (8), pp 1454-1461

|                              |                | Raw<br>Chemgauss<br>3<br>Pose/Score | Raw<br>Conensus<br>Pose/Score | Raw<br>Conensus<br>Pose,<br>Chemgauss3<br>Score | Raw<br>Chemgauss3<br>Conensus<br>Score | Raw<br>Chemgauss4<br>Pose/Score | Normalized<br>Chemgauss3<br>Pose/Score | Normalized<br>Conensus<br>Pose/Score | Normalized<br>Conensus<br>Pose,<br>Chemgauss3<br>Score | Raw<br>Chemgauss3<br>Conensus<br>Score | Normalized<br>Chemgauss4<br>Pose/Score | Average of<br>Normalized<br>Scores |
|------------------------------|----------------|-------------------------------------|-------------------------------|-------------------------------------------------|----------------------------------------|---------------------------------|----------------------------------------|--------------------------------------|--------------------------------------------------------|----------------------------------------|----------------------------------------|------------------------------------|
| <b>Supplementary Table 1</b> |                |                                     |                               |                                                 |                                        |                                 |                                        |                                      |                                                        |                                        |                                        |                                    |
| <b>Natural</b>               |                |                                     |                               |                                                 |                                        |                                 |                                        |                                      |                                                        |                                        |                                        |                                    |
|                              | Adenine        | -62.90                              | 601                           | -65.30                                          | 556                                    | -13.19                          |                                        | 1.05                                 | 1.06                                                   | 1.00                                   | 1.08                                   | 1.04                               |
|                              | Cytosine       | -51.72                              | 1849                          | -50.46                                          | 1940                                   | -10.98                          |                                        | 3.09                                 | 6.06                                                   | 3.52                                   | 6.41                                   | 4.40                               |
|                              | Guanine        | -54.31                              | 1975                          | -52.49                                          | 1896                                   | -10.81                          |                                        | 2.61                                 | 6.57                                                   | 3.18                                   | 6.24                                   | 4.34                               |
|                              | Uracil         | -62.52                              | 965                           | -63.49                                          | 881                                    | -12.74                          |                                        | 1.12                                 | 2.52                                                   | 1.31                                   | 2.33                                   | 1.73                               |
| <b>7-EAA</b>                 |                |                                     |                               |                                                 |                                        |                                 |                                        |                                      |                                                        |                                        |                                        |                                    |
|                              | 7-EAA          | -28.32                              | 2542                          | -14.22                                          | 2612                                   | -3.96                           | 7.34                                   | 8.84                                 | 9.68                                                   | 9.00                                   | 9.04                                   | 8.78                               |
|                              | 7-EAA triazole | -13.83                              | 2378                          | -12.54                                          | 2655                                   | -4.14                           | 9.98                                   | 8.18                                 | 9.97                                                   | 9.16                                   | 8.89                                   | 9.24                               |
|                              | A01 7-EAA      | -26.68                              | 1957                          | -26.68                                          | 2504                                   | -7.00                           | 7.64                                   | 6.49                                 | 7.56                                                   | 8.58                                   | 6.40                                   | 7.34                               |
|                              | A02 7-EAA      | -22.79                              | 2327                          | -41.46                                          | 2081                                   | -7.18                           | 8.35                                   | 7.98                                 | 5.05                                                   | 6.95                                   | 6.24                                   | 6.91                               |
|                              | A03 7-EAA      | -24.25                              | 2456                          | -33.26                                          | 2132                                   | -7.37                           | 8.09                                   | 8.50                                 | 6.45                                                   | 7.15                                   | 6.07                                   | 7.25                               |
|                              | A04 7-EAA      | -29.29                              | 2528                          | -39.60                                          | 2307                                   | -6.82                           | 7.17                                   | 8.78                                 | 5.37                                                   | 7.82                                   | 6.55                                   | 7.14                               |
|                              | A05 7-EAA      | -27.59                              | 2083                          | -42.10                                          | 1775                                   | -7.10                           | 7.48                                   | 7.00                                 | 4.94                                                   | 5.78                                   | 6.31                                   | 6.30                               |
|                              | A06 7-EAA      | -45.70                              | 1772                          | -26.11                                          | 1805                                   | -7.21                           | 4.18                                   | 5.75                                 | 7.66                                                   | 5.89                                   | 6.21                                   | 5.94                               |
|                              | A07 7-EAA      | -21.96                              | 1878                          | -15.66                                          | 2669                                   | -6.00                           | 8.50                                   | 6.18                                 | 9.44                                                   | 9.22                                   | 7.27                                   | 8.12                               |
|                              | A08 7-EAA      | -27.60                              | 2831                          | -17.02                                          | 2622                                   | -4.07                           | 7.48                                   | 10.00                                | 9.21                                                   | 9.04                                   | 8.97                                   | 8.93                               |
|                              | A09 7-EAA      | -28.43                              | 2538                          | -14.16                                          | 2604                                   | -4.16                           | 7.32                                   | 8.82                                 | 9.69                                                   | 8.97                                   | 8.87                                   | 8.73                               |
|                              | A10 7-EAA      | -22.68                              | 2510                          | -30.94                                          | 2872                                   | -8.31                           | 8.37                                   | 8.71                                 | 6.84                                                   | 10.00                                  | 5.25                                   | 7.83                               |
|                              | A11 7-EAA      | -30.32                              | 1801                          | -25.22                                          | 1955                                   | -7.10                           | 6.98                                   | 5.87                                 | 7.81                                                   | 6.47                                   | 6.30                                   | 6.69                               |
|                              | A12 7-EAA      | -30.55                              | 2286                          | -33.84                                          | 2366                                   | -7.92                           | 6.94                                   | 7.81                                 | 6.35                                                   | 8.05                                   | 5.59                                   | 6.95                               |
|                              | A13 7-EAA      | -48.02                              | 2109                          | -40.97                                          | 2214                                   | -8.79                           | 3.76                                   | 7.10                                 | 5.13                                                   | 7.47                                   | 4.83                                   | 5.66                               |
|                              | A14 7-EAA      | -22.59                              | 1973                          | -23.48                                          | 2396                                   | -6.52                           | 8.39                                   | 6.56                                 | 8.11                                                   | 8.17                                   | 6.81                                   | 7.61                               |
|                              | A15 7-EAA      | -41.85                              | 2703                          | -23.51                                          | 2840                                   | -7.32                           | 4.88                                   | 9.49                                 | 8.10                                                   | 9.88                                   | 6.12                                   | 7.69                               |
|                              | A16 7-EAA      | -44.22                              | 1996                          | -44.27                                          | 1652                                   | -9.34                           | 4.45                                   | 6.65                                 | 4.57                                                   | 5.30                                   | 4.36                                   | 5.07                               |
|                              | A17 7-EAA      | -44.04                              | 2440                          | -32.42                                          | 2588                                   | -8.43                           | 6.07                                   | 7.24                                 | 7.03                                                   | 8.10                                   | 5.55                                   | 6.80                               |
|                              | A18 7-EAA      | -32.85                              | 2074                          | -30.16                                          | 1847                                   | -6.81                           | 6.52                                   | 6.96                                 | 6.97                                                   | 6.05                                   | 6.56                                   | 6.61                               |
|                              | A19 7-EAA      | -17.98                              | 2415                          | -20.91                                          | 2344                                   | -5.21                           | 9.23                                   | 8.33                                 | 8.54                                                   | 7.97                                   | 7.95                                   | 8.40                               |
|                              | A20 7-EAA      | -36.21                              | 1815                          | -30.80                                          | 2156                                   | -8.88                           | 5.91                                   | 5.93                                 | 6.86                                                   | 7.24                                   | 4.76                                   | 6.14                               |
|                              | A21 7-EAA      | -53.71                              | 1335                          | -52.83                                          | 1181                                   | -7.83                           | 2.72                                   | 4.00                                 | 3.12                                                   | 3.49                                   | 5.68                                   | 3.80                               |
|                              | A22 7-EAA      | -56.95                              | 1430                          | -56.95                                          | 1233                                   | -8.74                           | 2.13                                   | 4.38                                 | 2.42                                                   | 3.69                                   | 4.88                                   | 3.50                               |
|                              | A23 7-EAA      | -54.08                              | 1270                          | -49.79                                          | 1348                                   | -8.97                           | 2.65                                   | 3.74                                 | 3.64                                                   | 4.13                                   | 4.67                                   | 3.77                               |
|                              | A24 7-EAA      | -19.80                              | 2423                          | -32.54                                          | 2865                                   | -6.64                           | 8.90                                   | 8.36                                 | 6.57                                                   | 9.97                                   | 6.71                                   | 8.10                               |
|                              | A25 7-EAA      | -35.30                              | 2143                          | -29.84                                          | 2378                                   | -7.97                           | 6.07                                   | 7.24                                 | 7.03                                                   | 8.10                                   | 5.55                                   | 6.80                               |
|                              | A26 7-EAA      | -44.58                              | 2077                          | -26.82                                          | 2063                                   | -8.12                           | 4.38                                   | 6.98                                 | 7.54                                                   | 6.88                                   | 5.42                                   | 6.24                               |
|                              | A27 7-EAA      | -40.59                              | 1575                          | -52.77                                          | 1446                                   | -8.15                           | 5.11                                   | 4.96                                 | 3.13                                                   | 4.51                                   | 5.39                                   | 4.62                               |
|                              | A28 7-EAA      | -52.22                              | 1294                          | -52.22                                          | 1179                                   | -8.59                           | 2.99                                   | 3.84                                 | 3.22                                                   | 3.48                                   | 5.01                                   | 3.71                               |
|                              | A29 7-EAA      | -28.59                              | 2183                          | -40.30                                          | 2089                                   | -6.38                           | 7.29                                   | 7.40                                 | 5.25                                                   | 6.98                                   | 6.93                                   | 6.77                               |
|                              | A30 7-EAA      | -32.15                              | 2109                          | -40.91                                          | 1893                                   | -8.56                           | 6.65                                   | 7.10                                 | 5.15                                                   | 6.23                                   | 5.03                                   | 6.03                               |
|                              | A31 7-EAA      | -28.04                              | 2094                          | -39.53                                          | 2223                                   | -8.52                           | 7.39                                   | 8.65                                 | 5.38                                                   | 7.50                                   | 5.07                                   | 6.80                               |
|                              | A32 7-EAA      | -37.53                              | 2104                          | -41.14                                          | 1832                                   | -7.99                           | 5.67                                   | 7.08                                 | 5.11                                                   | 5.99                                   | 5.53                                   | 5.94                               |
|                              | A33 7-EAA      | -34.70                              | 2073                          | -32.94                                          | 2580                                   | -7.23                           | 6.18                                   | 6.96                                 | 6.50                                                   | 8.88                                   | 6.20                                   | 6.94                               |
|                              | A34 7-EAA      | -47.25                              | 2230                          | -32.62                                          | 2478                                   | -6.52                           | 3.90                                   | 7.59                                 | 6.55                                                   | 8.48                                   | 6.81                                   | 6.67                               |
|                              | A35 7-EAA      | -38.95                              | 1950                          | -30.06                                          | 1878                                   | -8.12                           | 5.41                                   | 6.47                                 | 6.99                                                   | 6.17                                   | 5.42                                   | 6.09                               |
|                              | A36 7-EAA      | -43.21                              | 1431                          | -43.21                                          | 1330                                   | -8.36                           | 4.63                                   | 4.39                                 | 4.75                                                   | 4.06                                   | 5.21                                   | 4.61                               |
|                              | A37 7-EAA      | -27.90                              | 2321                          | -28.44                                          | 2432                                   | -9.44                           | 7.42                                   | 7.95                                 | 7.26                                                   | 8.31                                   | 4.27                                   | 7.04                               |
|                              | A38 7-EAA      | -34.23                              | 2137                          | -32.21                                          | 1916                                   | -7.70                           | 6.27                                   | 7.22                                 | 6.62                                                   | 6.32                                   | 5.79                                   | 6.44                               |
|                              | A39 7-EAA      | -39.55                              | 2268                          | -32.69                                          | 1970                                   | -8.98                           | 5.30                                   | 7.74                                 | 6.54                                                   | 6.53                                   | 4.67                                   | 6.16                               |
|                              | A40 7-EAA      | -50.08                              | 2065                          | -50.08                                          | 1725                                   | -8.65                           | 3.38                                   | 6.93                                 | 3.59                                                   | 5.58                                   | 6.70                                   | 5.24                               |
|                              | A41 7-EAA      | -29.58                              | 1882                          | -29.58                                          | 2035                                   | -6.38                           | 7.12                                   | 6.19                                 | 7.07                                                   | 6.78                                   | 6.94                                   | 6.82                               |
|                              | A42 7-EAA      | -29.15                              | 2440                          | -23.68                                          | 2632                                   | -6.73                           | 7.19                                   | 8.43                                 | 8.07                                                   | 9.08                                   | 6.63                                   | 7.88                               |
|                              | A43 7-EAA      | -24.14                              | 2347                          | -36.05                                          | 2097                                   | -6.46                           | 8.11                                   | 8.06                                 | 5.97                                                   | 7.02                                   | 6.86                                   | 7.20                               |
|                              | A44 7-EAA      | -28.19                              | 2106                          | -19.52                                          | 2162                                   | -5.91                           | 7.37                                   | 7.09                                 | 8.78                                                   | 7.27                                   | 7.34                                   | 7.57                               |
|                              | A45 7-EAA      | -22.30                              | 1808                          | -23.67                                          | 2519                                   | -4.95                           | 8.44                                   | 5.90                                 | 8.08                                                   | 8.64                                   | 8.18                                   | 7.85                               |
|                              | A46 7-EAA      | -18.38                              | 2733                          | -13.50                                          | 2630                                   | -2.86                           | 9.15                                   | 9.61                                 | 9.80                                                   | 9.07                                   | 10.00                                  | 9.53                               |
|                              | A47 7-EAA      | -56.25                              | 1791                          | -37.19                                          | 1423                                   | -8.75                           | 2.26                                   | 5.83                                 | 5.78                                                   | 4.42                                   | 4.87                                   | 4.63                               |
|                              | A48 7-EAA      | -47.08                              | 1873                          | -47.08                                          | 1521                                   | -7.26                           | 3.83                                   | 6.16                                 | 4.10                                                   | 4.86                                   | 6.17                                   | 5.04                               |
|                              | A49 7-EAA      | -26.34                              | 1877                          | -26.34                                          | 1678                                   | -6.34                           | 7.71                                   | 6.17                                 | 7.62                                                   | 5.40                                   | 6.97                                   | 6.77                               |
|                              | A50 7-EAA      | -23.38                              | 1939                          | -22.43                                          | 2202                                   | -3.25                           | 8.24                                   | 6.42                                 | 8.29                                                   | 7.42                                   | 9.66                                   | 8.01                               |
|                              | A51 7-EAA      | -37.85                              | 2059                          | -38.40                                          | 2138                                   | -8.30                           | 5.61                                   | 6.90                                 | 5.57                                                   | 7.17                                   | 5.27                                   | 6.10                               |
|                              | A52 7-EAA      | -22.96                              | 2045                          | -17.21                                          | 2395                                   | -6.06                           | 8.32                                   | 6.85                                 | 9.17                                                   | 8.16                                   | 7.21                                   | 7.94                               |
|                              | A53 7-EAA      | -33.39                              | 1918                          | -33.39                                          | 2303                                   | -6.57                           | 6.42                                   | 6.34                                 | 6.42                                                   | 7.81                                   | 6.77                                   | 6.75                               |
|                              | A54 7-EAA      | -13.73                              | 2397                          | -12.34                                          | 2667                                   | -4.07                           | 10.00                                  | 8.26                                 | 10.00                                                  | 9.21                                   | 8.95                                   | 9.28                               |
|                              | A55 7-EAA      | -44.54                              | 2233                          | -42.90                                          | 1796                                   | -8.21                           | 4.39                                   | 7.60                                 | 4.81                                                   | 5.86                                   | 5.34                                   | 5.60                               |
|                              | A56 7-EAA      | -30.57                              | 2176                          | -41.19                                          | 1882                                   | -7.68                           | 6.93                                   | 7.37                                 | 5.10                                                   | 6.19                                   | 5.80                                   | 6.28                               |
| <b>2-AP</b>                  |                |                                     |                               |                                                 |                                        |                                 |                                        |                                      |                                                        |                                        |                                        |                                    |
|                              | 2-AP triazole  | -18.38                              | 2734                          | -13.49                                          | 2642                                   | -2.95                           | 9.15                                   | 9.61                                 | 9.80                                                   | 9.11                                   | 9.92                                   | 9.52                               |
| <b>1-ER</b>                  |                |                                     |                               |                                                 |                                        |                                 |                                        |                                      |                                                        |                                        |                                        |                                    |
|                              | 1-ER           | -59.91                              | 900                           | -59.91                                          | 792                                    | -11.02                          | 1.59                                   | 2.26                                 | 1.92                                                   | 1.99                                   | 2.90                                   | 2.13                               |
|                              | A01 1-ER       | -59.17                              | 708                           | -59.17                                          | 638                                    | -12.38                          | 1.73                                   | 1.49                                 | 2.04                                                   | 1.40                                   | 1.70                                   | 1.67                               |
|                              | A02 1-ER       | -47.60                              | 1806                          | -36.56                                          | 1738                                   | -8.84                           | 3.84                                   | 5.89                                 | 5.88                                                   | 5.63                                   | 4.79                                   | 5.21                               |
|                              | A03 1-ER       | -117.01                             | 1092                          | -49.45                                          | 1092                                   | -10.38                          | 3.21                                   | 3.37                                 | 3.69                                                   | 3.15                                   | 3.45                                   | 3.37                               |
|                              | A04 1-ER       | -59.91                              | 900                           | -59.91                                          | 792                                    | -11.02                          | 1.59                                   | 2.26                                 | 1.92                                                   | 1.99                                   | 2.90                                   | 2.13                               |
|                              | A05 1-ER       | -55.40                              | 1523                          | -44.43                                          | 1446                                   | -11.00                          | 2.41                                   | 4.75                                 | 4.55                                                   | 4.51                                   | 2.91                                   | 3.83                               |
|                              | A06 1-ER       | -52.19                              | 1234                          | -56.33                                          | 1129                                   | -10.74                          | 3.00                                   | 3.59                                 | 2.52                                                   | 3.29                                   | 3.14                                   | 3.11                               |
|                              | A07 1-ER       | -47.43                              | 1773                          | -46.41                                          | 1530                                   | -9.35                           | 3.87                                   | 5.76                                 | 4.21                                                   | 4.83                                   | 4.34                                   | 4.60                               |
|                              | A08 1-ER       | -52.43                              | 1129                          | -53.26                                          | 1081                                   | -9.08                           | 2.96                                   | 3.17                                 | 3.05                                                   | 3.10                                   | 4.58                                   | 3.37                               |
|                              | A09 1-ER       | -50.46                              | 1135                          | -50.26                                          | 992                                    | -10.98                          | 3.31                                   | 3.20                                 | 3.56                                                   | 2.76                                   | 2.93                                   | 3.14                               |
|                              | A10 1-ER       | -47.42                              | 1491                          | -52.75                                          | 1669                                   | -10.67                          | 3.87                                   | 4.63                                 | 3.13                                                   | 5.37                                   | 3.19                                   | 4.04                               |
|                              | A11 1-ER       | -58.59                              | 1120                          | -51.45                                          | 1148                                   | -10.85                          | 1.83                                   | 3.14                                 | 4.35                                                   | 4.16                                   | 3.36                                   | 3.04                               |
|                              | A12 1-ER       | -54.04                              | 1314                          | -48.87                                          | 1162                                   | -11.25                          | 2.66                                   | 3.92                                 | 3.79                                                   | 3.41                                   | 2.69                                   | 3.30                               |
|                              | A13 1-ER       | -56.86                              | 1731                          | -44.88                                          | 1847                                   | -10.28                          | 2.15                                   | 5.59                                 | 4.47                                                   | 6.05                                   | 3.53                                   | 4.36                               |
|                              | A14 1-ER       | -44.30                              | 1355                          | -40.77                                          | 1842                                   | -8.87                           | 4.44                                   | 4.08                                 | 5.17                                                   | 6.03                                   | 4.76                                   | 4.90                               |
|                              | A15 1-ER       | -43.74                              | 1621                          | -39.35                                          | 1559                                   | -9.27                           | 4.54                                   | 5.15                                 | 5.41                                                   | 4.94                                   | 4.41                                   | 4.89                               |
|                              | A16 1-ER       | -53.18                              | 1370                          | -51.96                                          | 1223                                   | -11.30                          | 2.82                                   | 4.14                                 | 3.27                                                   | 3.65                                   | 2.65                                   | 3.30                               |
|                              | A17 1-ER       | -54.89                              | 1694                          | -50.45                                          | 1574                                   | -12.02                          | 2.51                                   | 5.44                                 | 3.52                                                   | 5.00                                   | 2.02                                   | 3.70                               |
|                              | A18 1-ER       | -33.89                              | 2457                          | -31.14                                          | 2508                                   | -8.04                           | 6.33                                   | 8.50                                 | 6.31                                                   | 8.60                                   | 5.49                                   | 7.14                               |
|                              | A19 1-ER       | -57.23                              | 587                           | -57.23                                          | 535                                    | -10.93                          | 2.08                                   | 1.00                                 | 2.27                                                   | 1.00                                   | 2.97                                   | 1.88                               |
|                              | A20 1-ER       | -52.67                              | 1288                          | -53.67                                          | 1116                                   | -11.03                          | 2.91                                   | 3.81                                 | 2.98                                                   | 3.24                                   | 2.88                                   | 3.16                               |
|                              | A21 1-ER       | -52.67                              | 1297                          | -53.67                                          | 1125                                   | -11.03                          | 2.91                                   | 3.85                                 | 2.98                                                   | 3.27                                   | 2.88                                   | 3.18                               |
|                              | A22 1-ER       | -57.57                              | 1640                          | -52.93                                          | 1423                                   | -10.46                          | 2.02                                   | 5.22                                 | 3.10                                                   | 4.42                                   | 3.38                                   | 3.63                               |
|                              | A23 1-ER       | -53.49                              | 1603                          | -44.30                                          | 1725                                   | -11.50                          | 2.76                                   | 5.07                                 | 4.57                                                   | 5.58                                   | 2.47                                   | 4.09                               |
|                              | A24 1-ER       | -53.60                              | 1131                          | -52.62                                          | 1389                                   | -10.29                          | 2.74                                   | 3.18                                 | 3.16                                                   | 4.29                                   | 3.53                                   | 3.38                               |
|                              | A25 1-ER       | -47.39                              | 1805                          | -50.79                                          |                                        |                                 |                                        |                                      |                                                        |                                        |                                        |                                    |

KO-369

Automation directory:  
Sample : KO369-1

Pulse Sequence: s2pul

Solvent: cdcl3

Temp. 30.0 C / 303.1 K

Operator: beal

Mercury-300BB "localhost.localdomain"

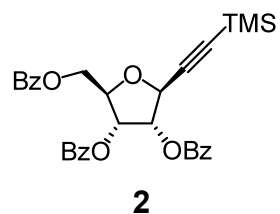

Relax. delay 1.000 sec  
Pulse 45.0 degrees  
Acq. time 1.997 sec  
Width 4800.8 Hz  
8 repetitions  
OBSERVE H1, 300.0461961 MHz  
DATA PROCESSING  
Line broadening 0.2 Hz  
FT size 32768  
Total time 0 min, 34 sec

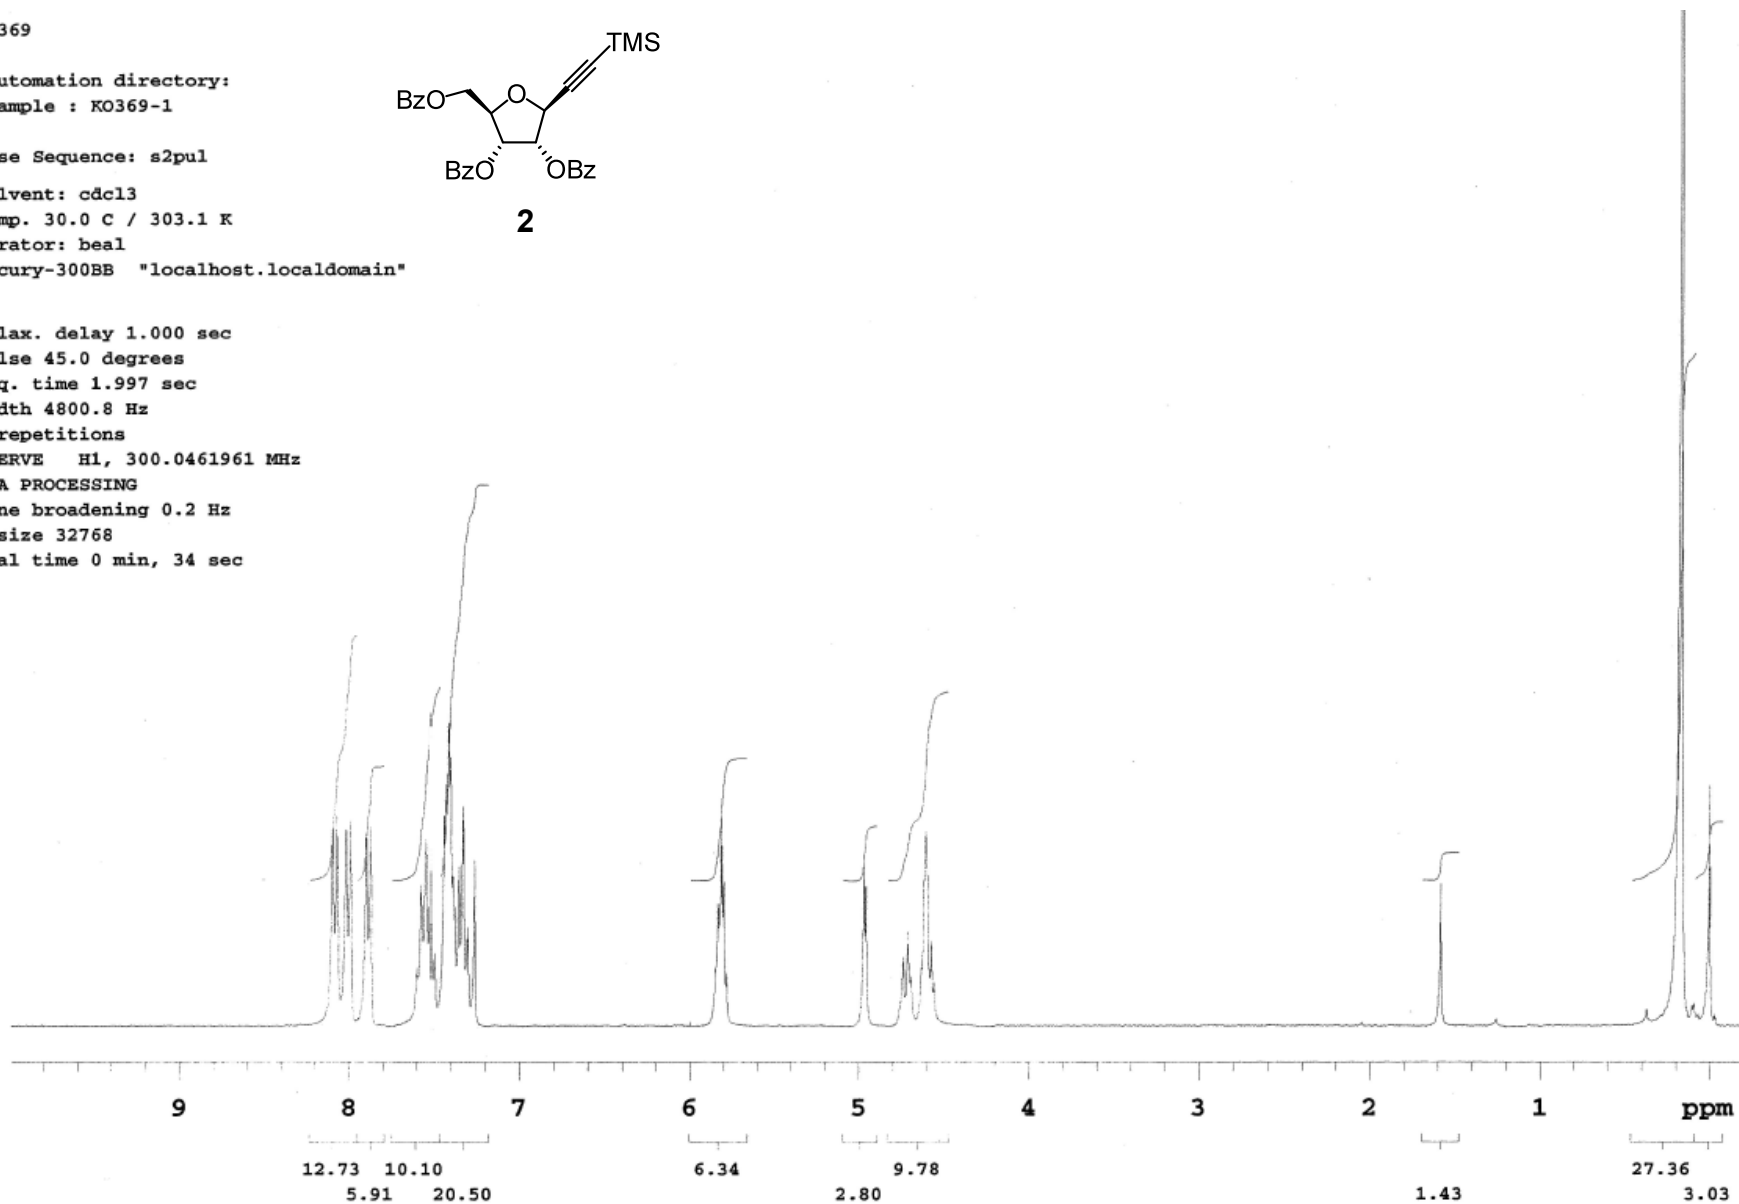

1216 repetitions  
OBSERVE C13, 150.7851911 MHz  
DECOUPLE H1, 599.6653321 MHz  
Power 44 dB  
continuously on  
WALTZ-16 modulated  
DATA PROCESSING  
Line broadening 0.5 Hz  
FT size 131072  
Total time 3 hr, 12 min, 27 sec

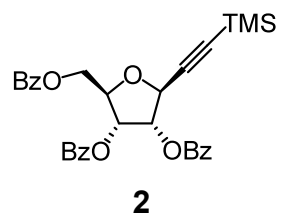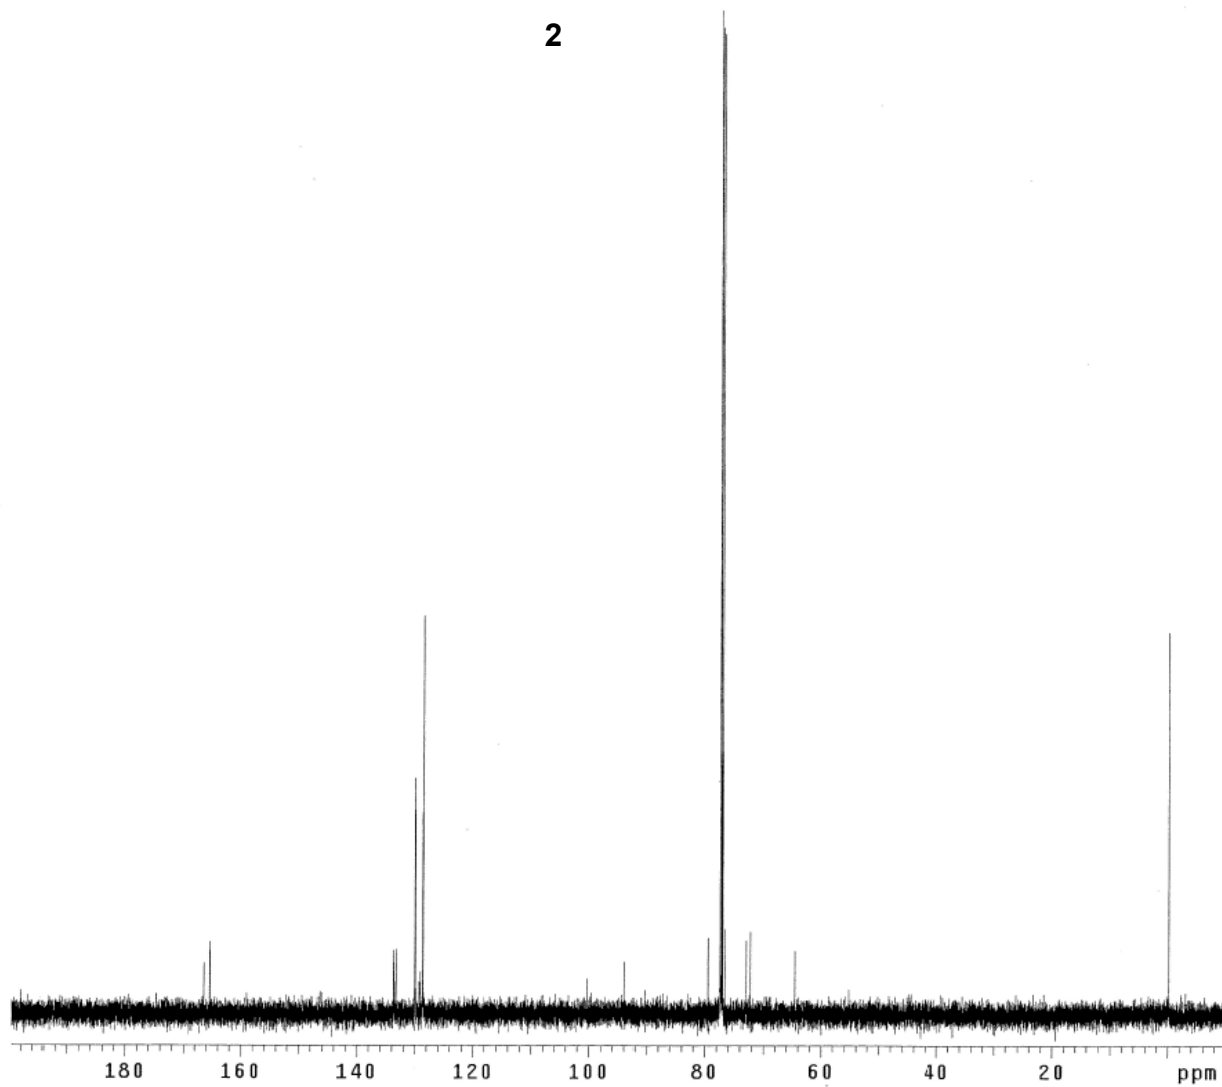



KO-374

Automation directory:  
Sample : KO-374

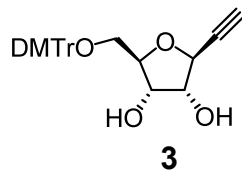

Pulse Sequence: s2pul  
Solvent: cd2c12  
Temp. 30.0 C / 303.1 K  
Operator: beal  
Mercury-300BB "localhost.localdomain"

Relax. delay 1.000 sec  
Pulse 45.0 degrees  
Acq. time 1.997 sec  
Width 4800.8 Hz  
8 repetitions  
OBSERVE H1, 300.0467776 MHz  
DATA PROCESSING  
Line broadening 0.2 Hz  
FT size 32768  
Total time 0 min, 34 sec

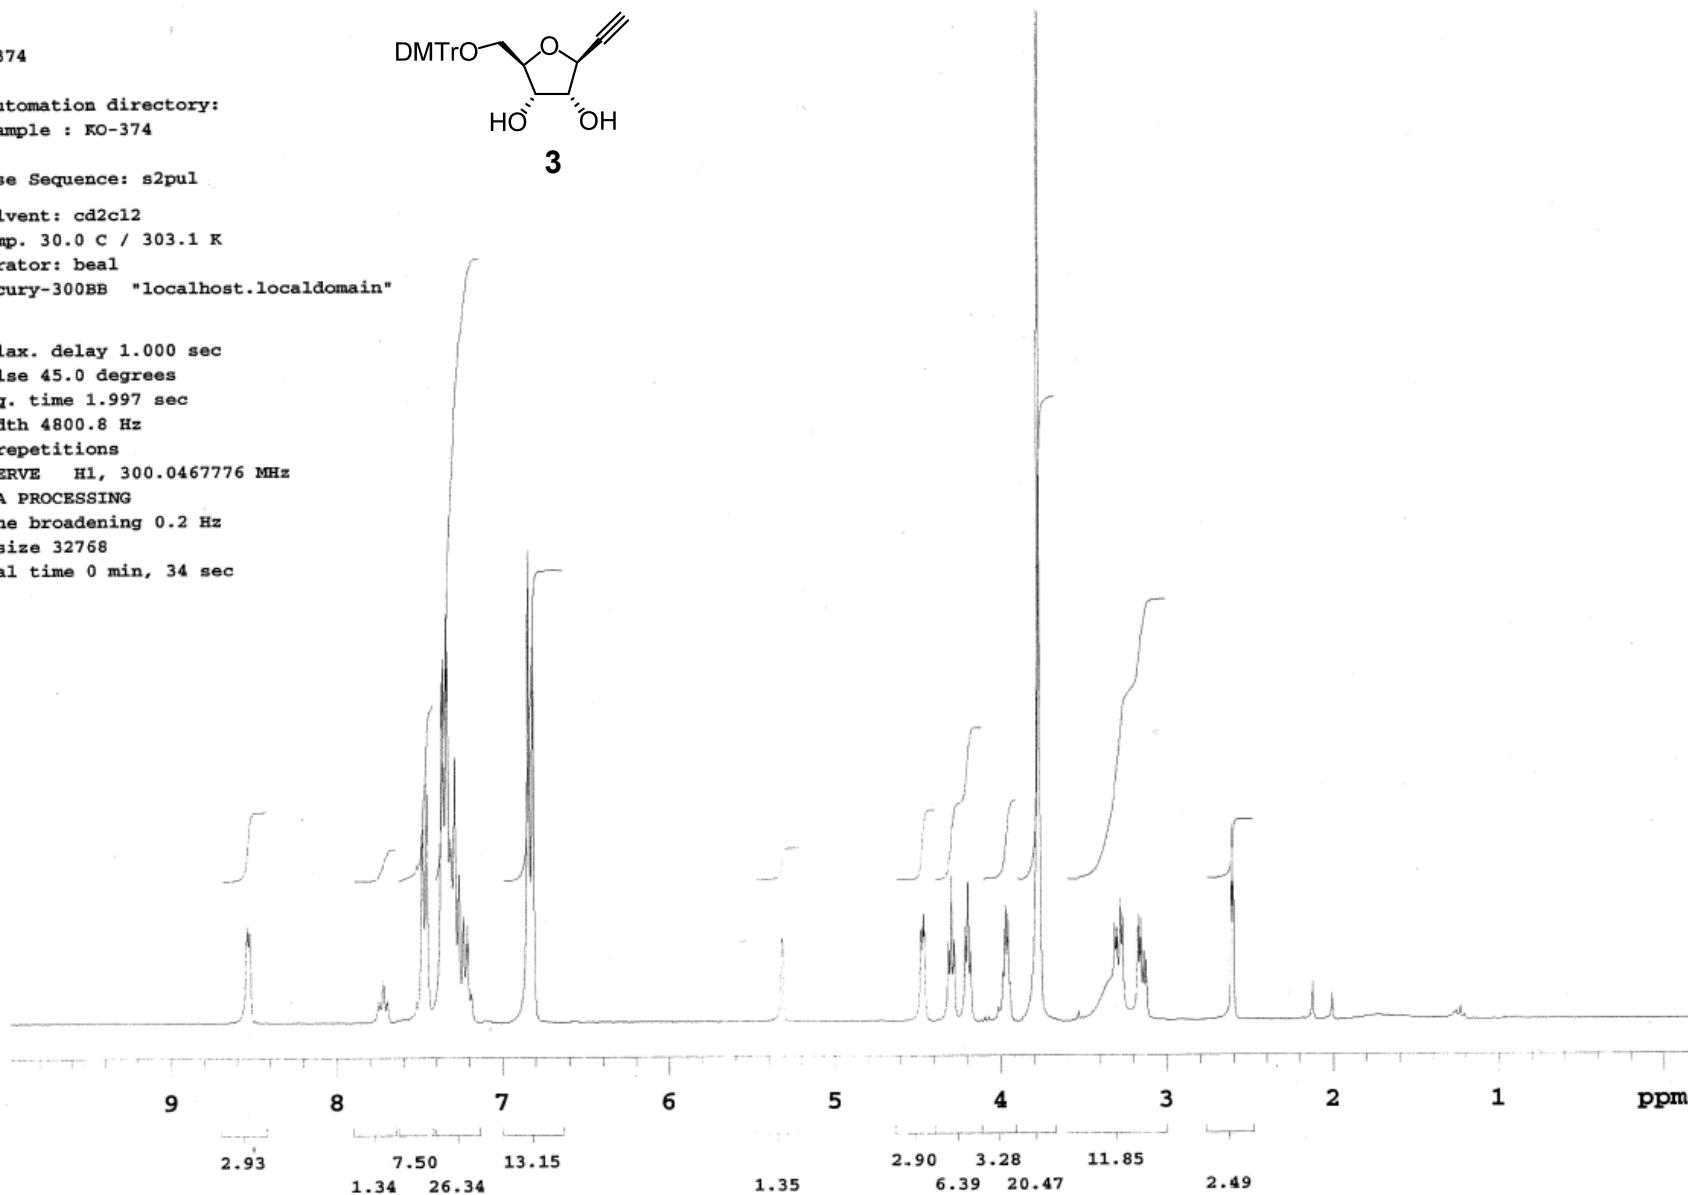

896 repetitions  
OBSERVE C13, 150.7851925 MHz  
DECOUPLE H1, 599.6653321 MHz  
Power 44 dB  
continuously on  
WALTZ-16 modulated  
DATA PROCESSING  
Line broadening 0.5 Hz  
FT size 131072  
Total time 3 hr, 12 min, 27 sec

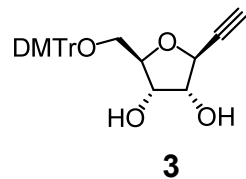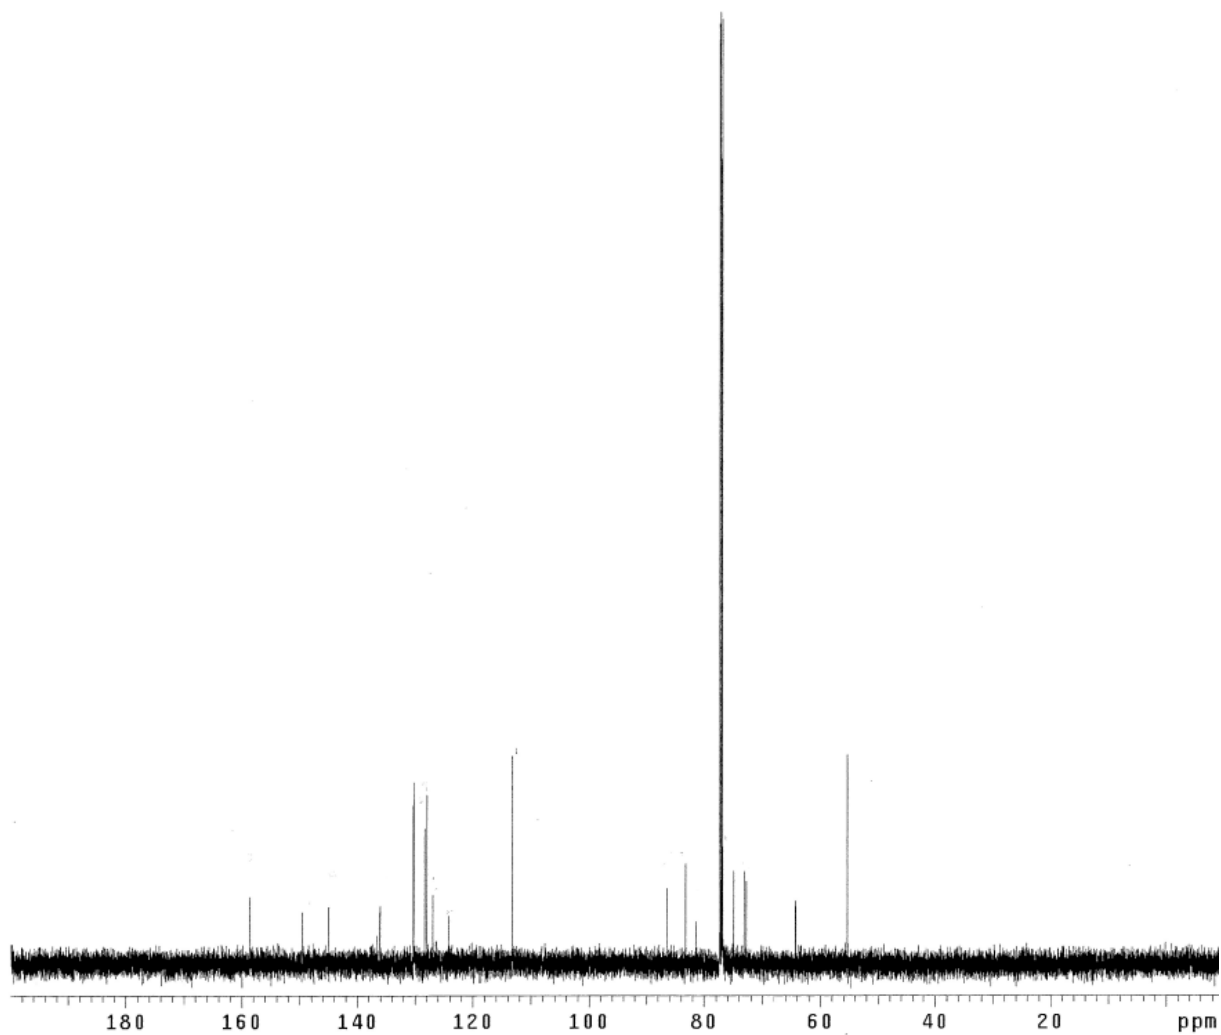

KO-374

Automation directory:  
Sample : KO-374

Pulse Sequence: NOESY1D

Solvent: cd2cl2  
Temp. 30.0 C / 303.1 K  
Operator: beal  
Mercury-300BB "localhost.localdomain"

Relax. delay 1.000 sec  
Pulse 90.0 degrees  
Mixing 0.500 sec  
Acq. time 2.661 sec  
Width 3601.0 Hz  
656 repetitions  
OBSERVE H1, 300.0467717 MHz  
DATA PROCESSING  
Line broadening 0.4 Hz  
FT size 32758

Total time 1 hr 15 min 40 sec

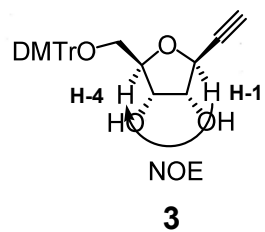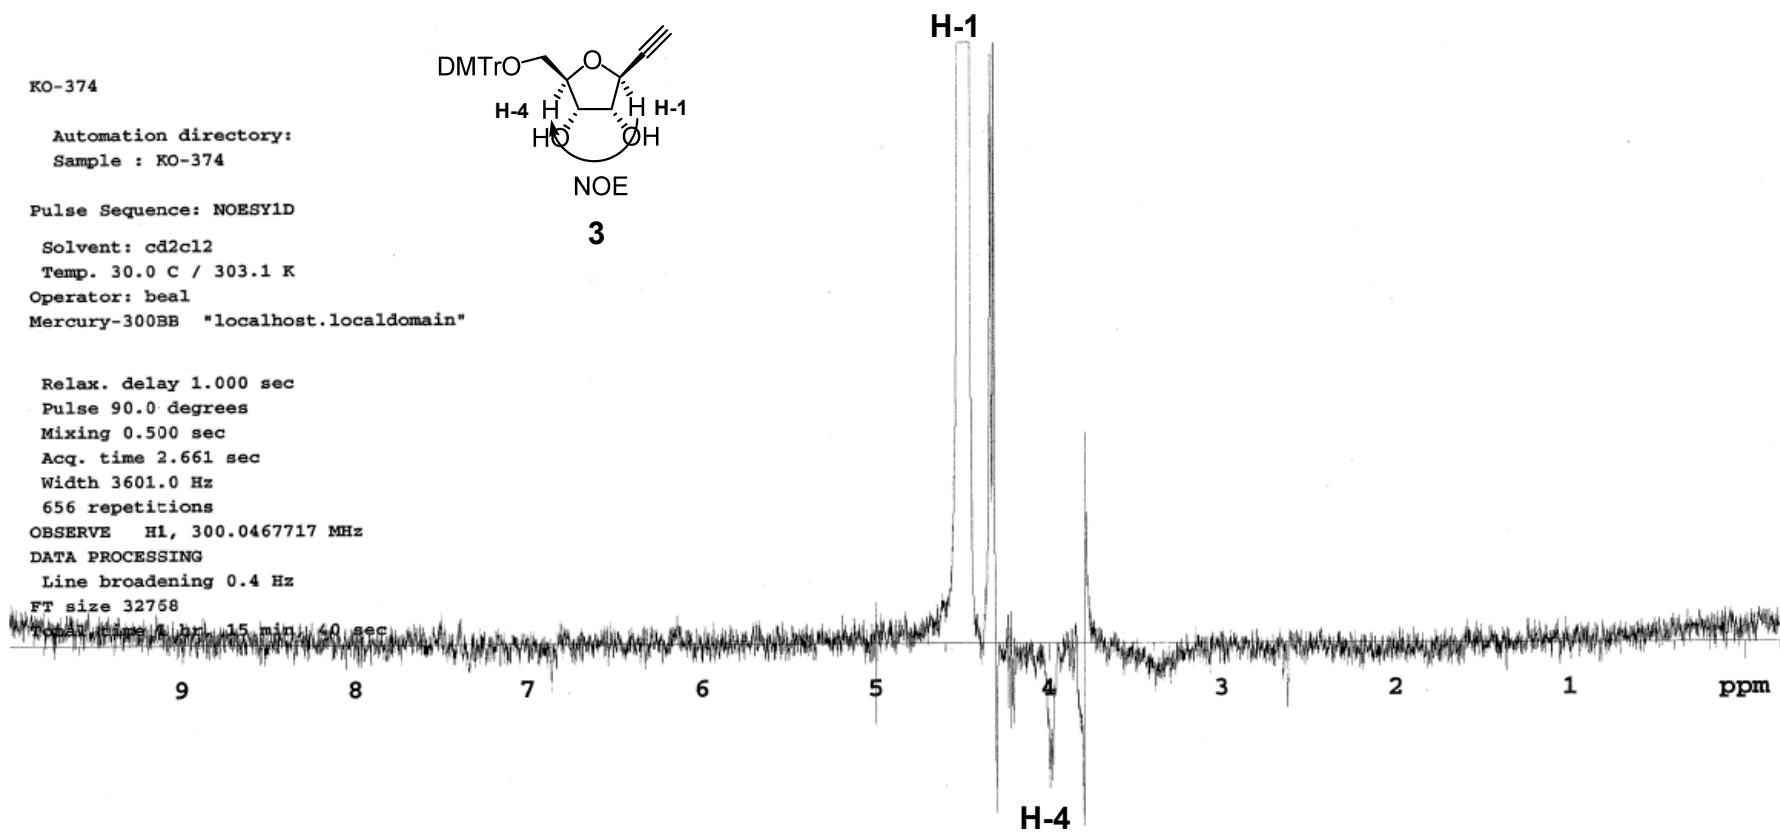

KO412-2

Automation directory:  
Sample : KO412-2

Pulse Sequence: s2pul

Solvent: cd2cl2

Temp. 25.0 C / 298.1 K

Operator: beal

Mercury-300BB "localhost.localdomain"

Relax. delay 1.000 sec

Pulse 45.0 degrees

Acq. time 1.997 sec

Width 4800.8 Hz

8 repetitions

OBSERVE HL, 300.0467764 MHz

DATA PROCESSING

Line broadening 0.2 Hz

FT size 32768

Total time 0 min, 34 sec

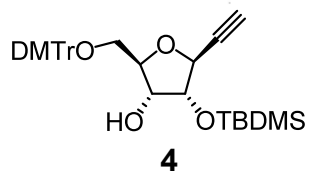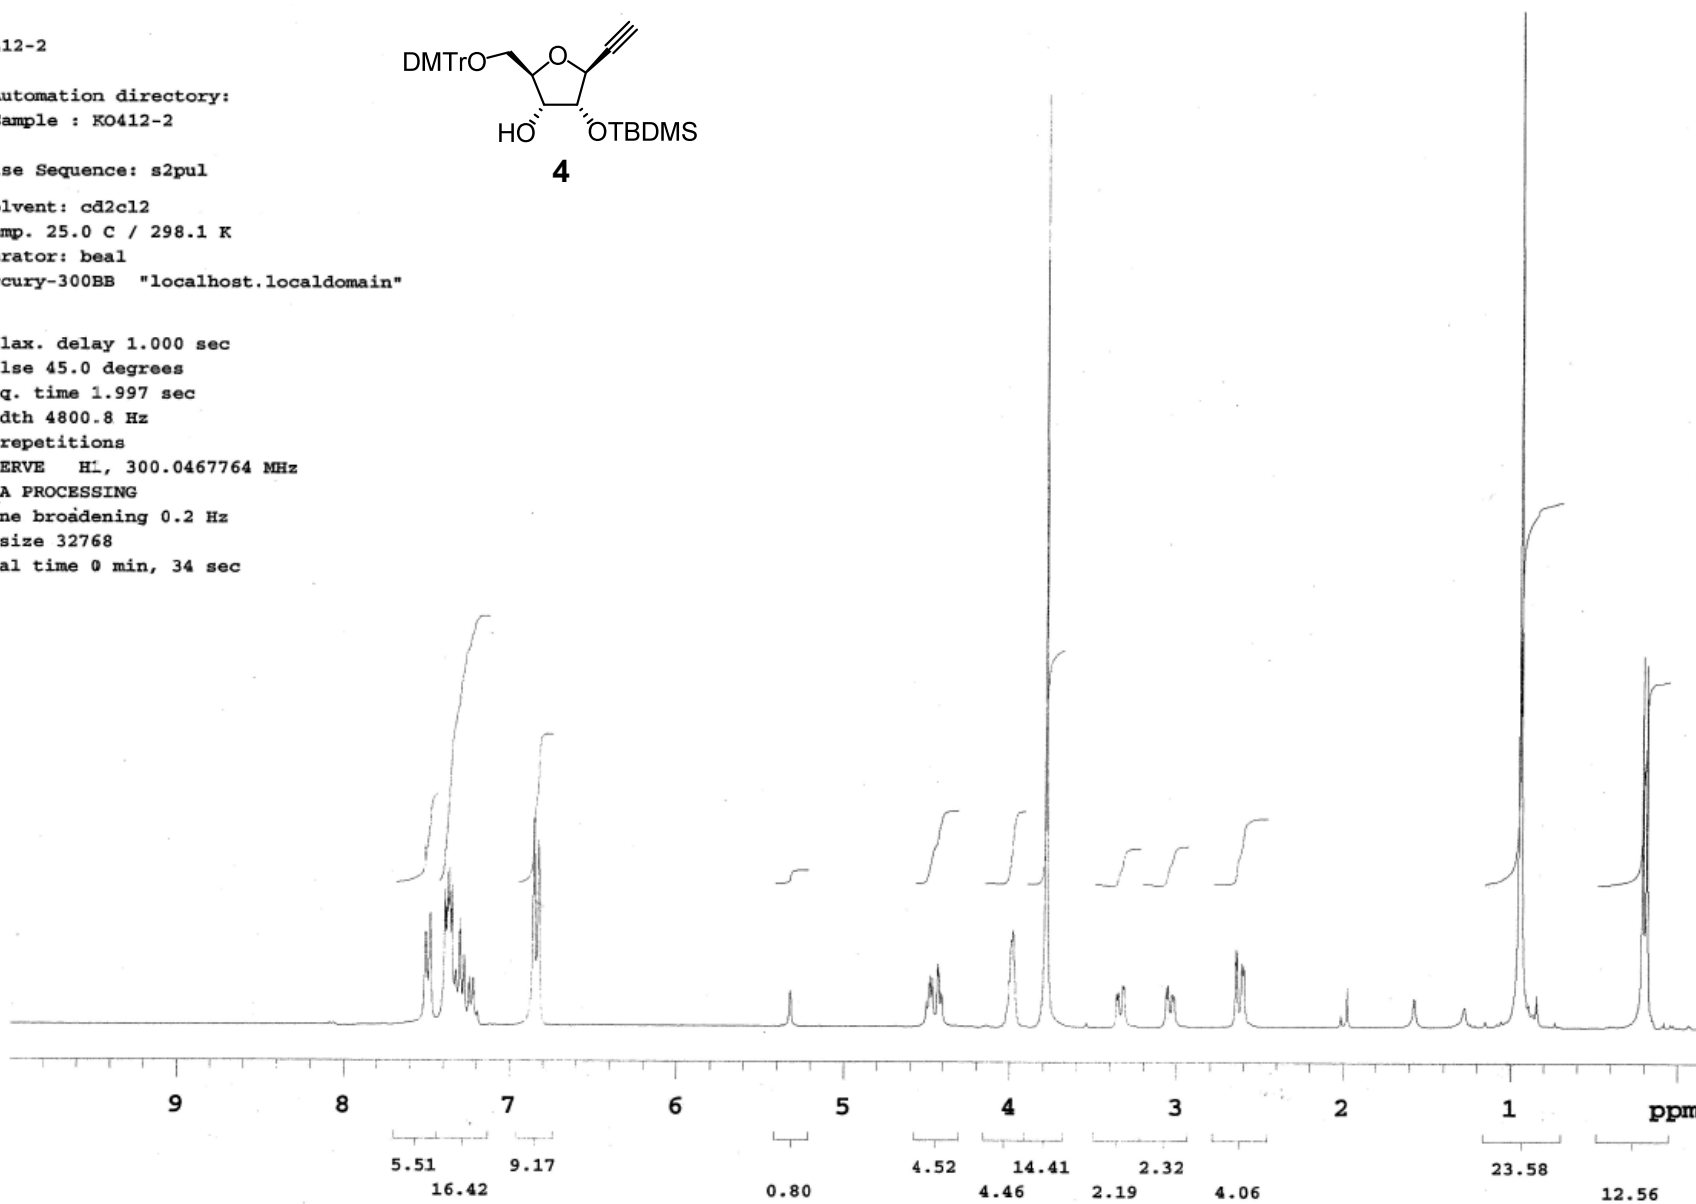

OBSERVE C13, 150.7854367 MHz  
DECOUPLE H1, 599.6664835 MHz  
Power 44 dB  
continuously on  
WALTZ-16 modulated  
DATA PROCESSING  
Line broadening 0.5 Hz  
FT size 131072  
Total time 3 hr, 12 min, 27 sec

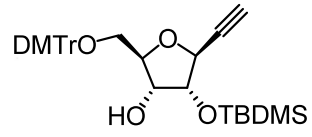

4

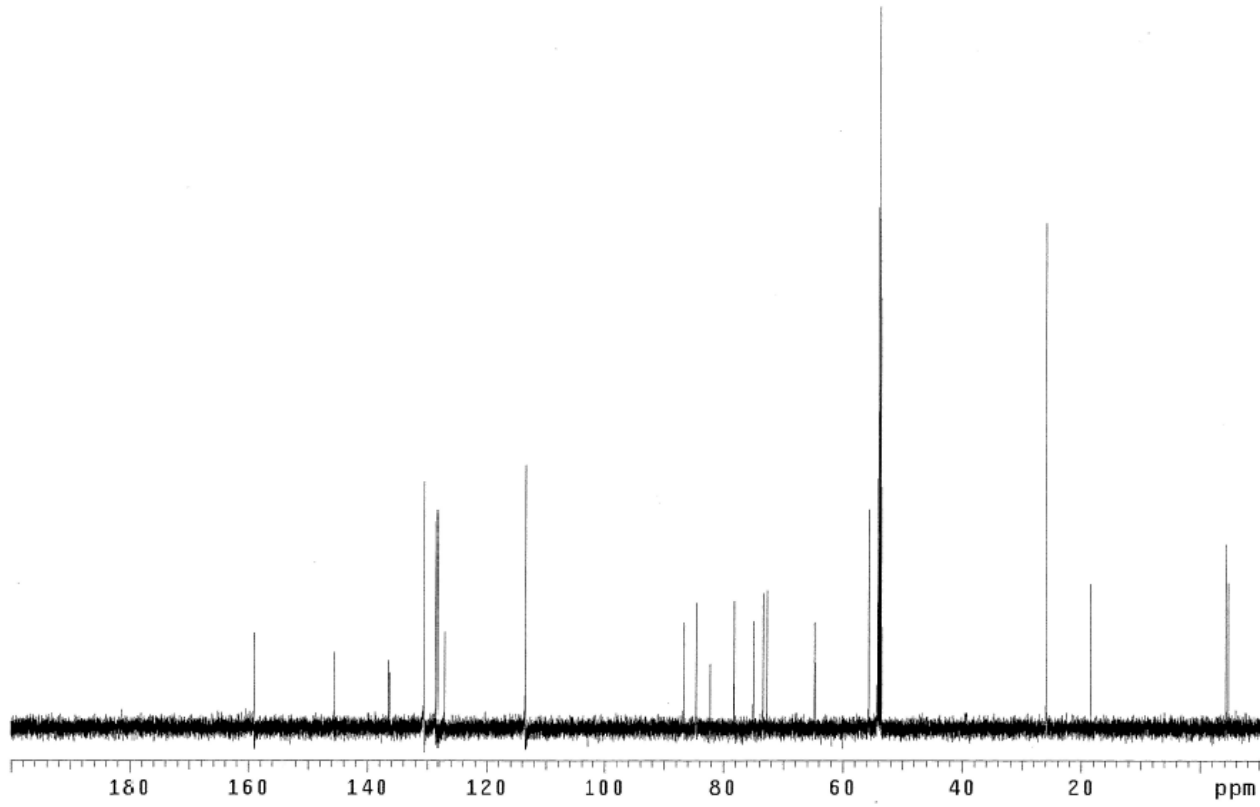

KO-380

Automation directory:  
Sample : KO-380

Pulse Sequence: s2pul

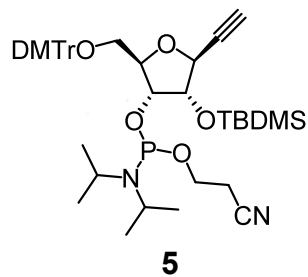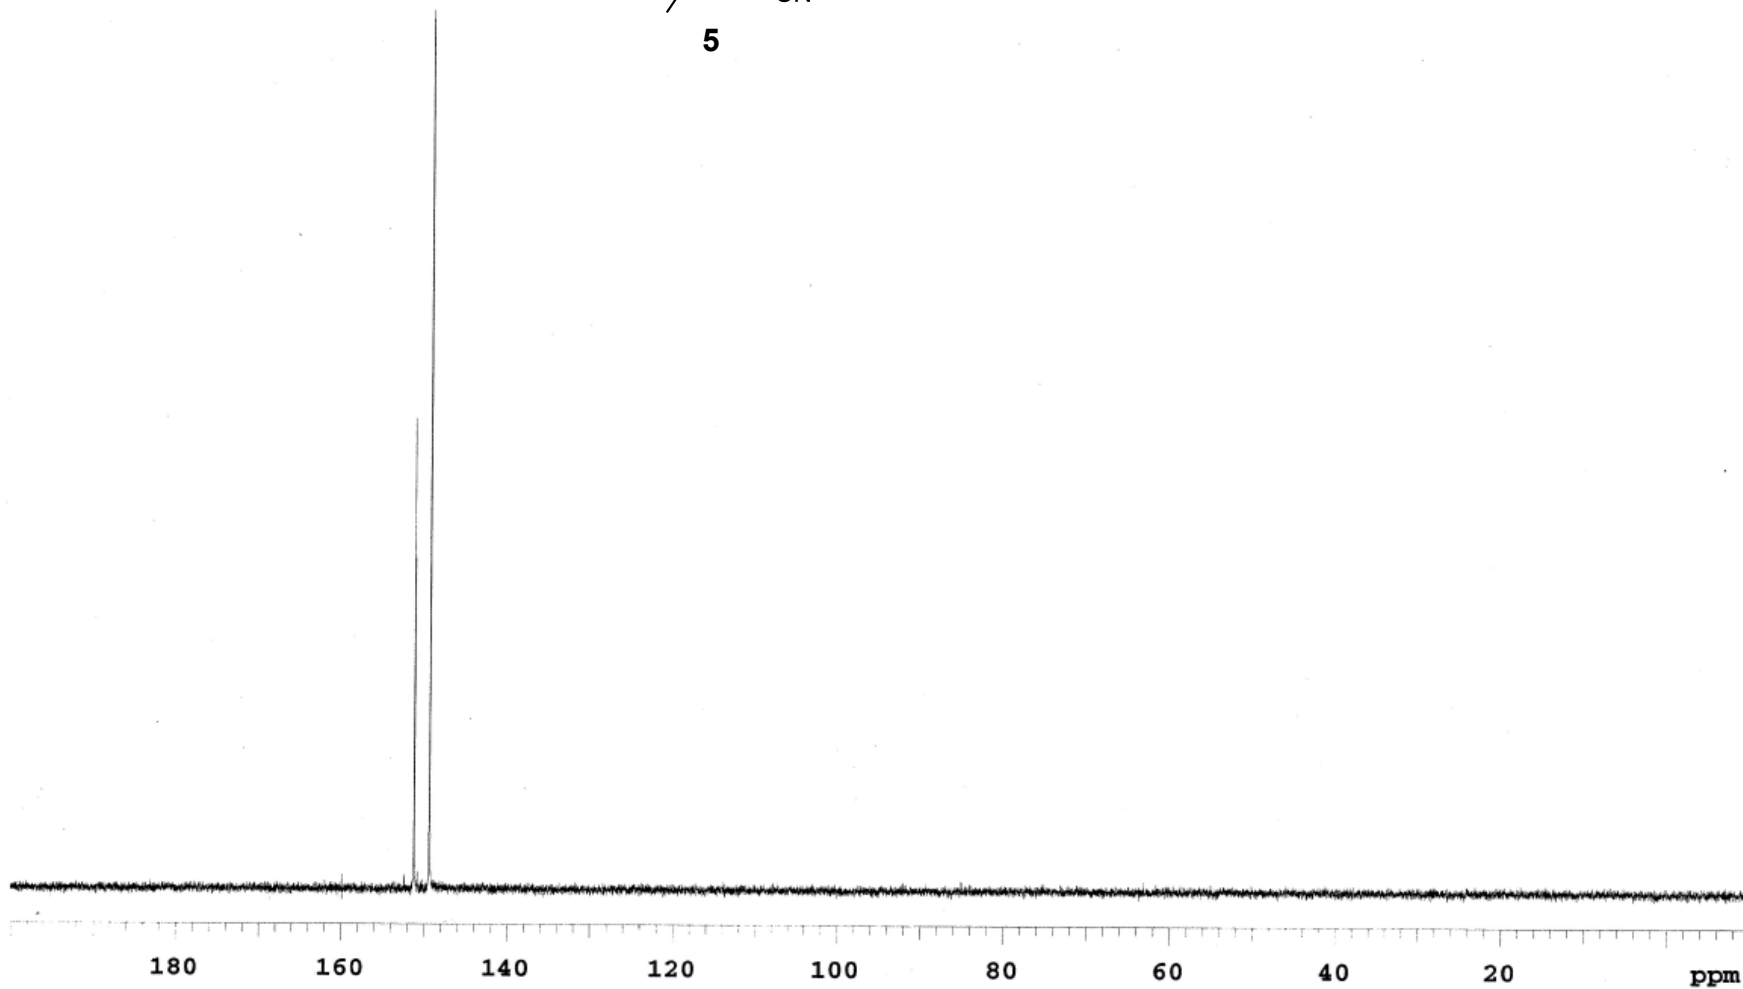

Supplement: NIHMS537988-supplement-1_si_001.pdf [file NIHMS537988-supplement-1_si_001.pdf]
